# Supplementary material for: Pentraxin 3 deficiency enhances features of chronic rejection in a mouse orthotopic lung transplantation model
Source: PubMed Central journal article supplement (PMC5823599; doi:10.18632/oncotarget.23902), 2018-01-03
Supplement: oncotarget-09-8489-s001.pdf [file oncotarget-09-8489-s001.pdf]

# Pentraxin 3 deficiency enhances features of chronic rejection in a mouse orthotopic lung transplantation model

## SUPPLEMENTARY MATERIALS

### A Design for PTX3 genotyping

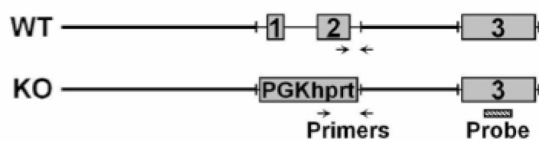

### B PCR genotyping

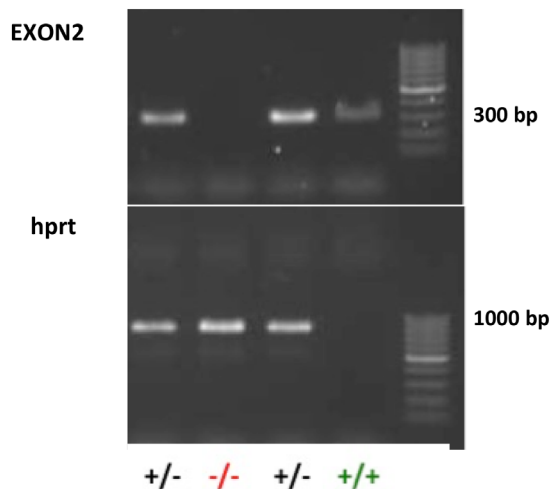

Genotyping of PTX3 transgenic mice  
(A) Schematic diagram of designing PCR primers  
(B) Representative results of PCR genotyping.

**Supplementary Figure 1: Genotyping of PTX3 KO mice.** (A) Schematic diagram of design of PCR primers for genotyping. (B) Example of PCR blots for genotyping.

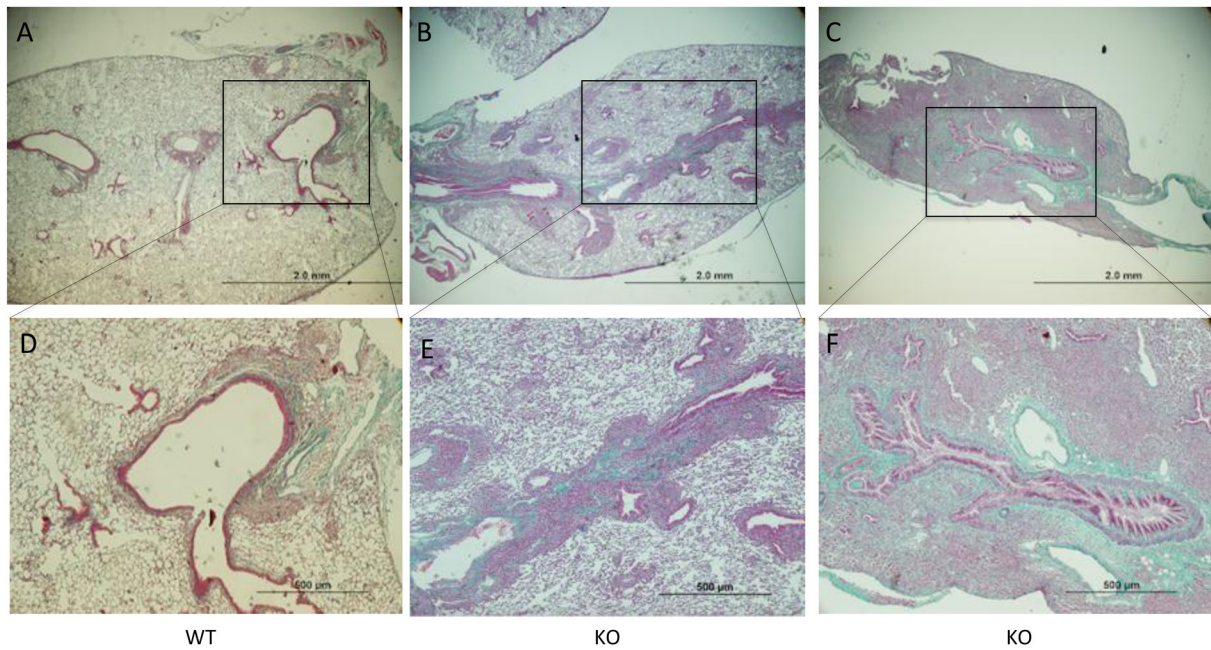

**Supplementary Figure 2: Masson Trichrome staining on Day 28 after left lung transplantation.** (A–C) x40 original magnification. (D–F) x100 original magnification. (A, D) Lung graft from WT recipient; (B, E) graft from KO recipient with less lung consolidation on CT; and (C, F) graft from KO recipient with severe lung consolidation based on Micro-CT.

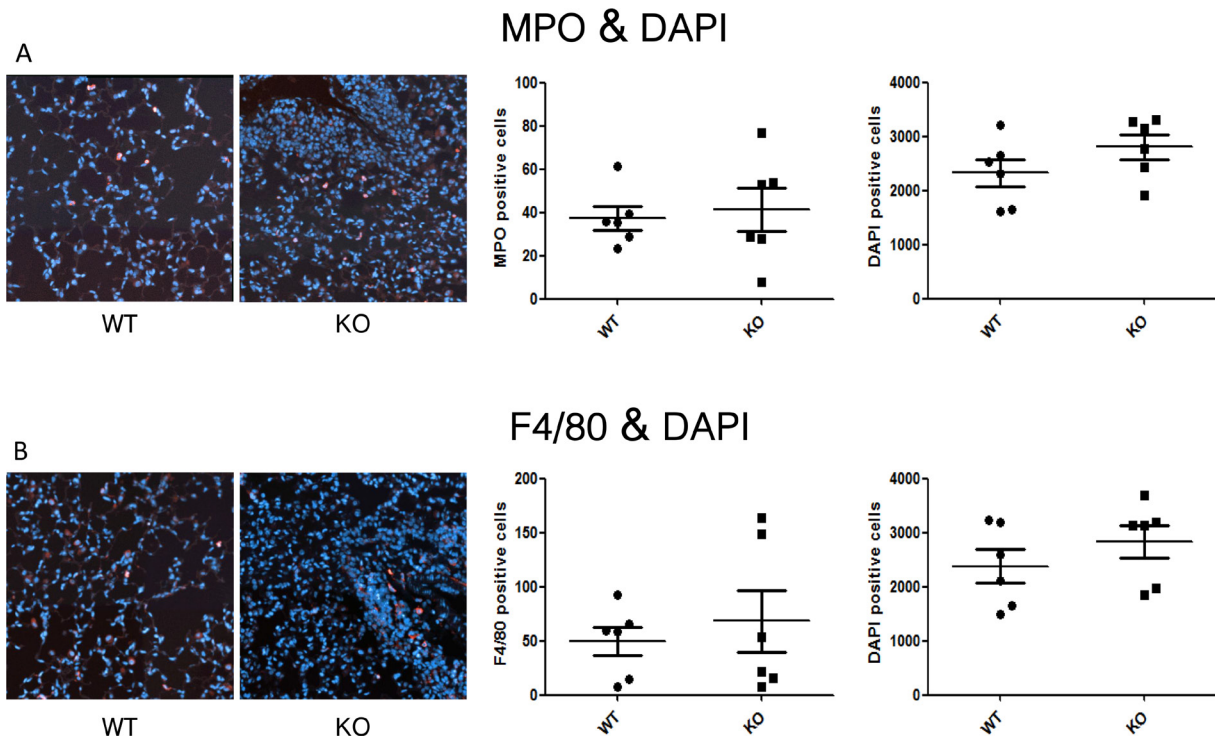

**Supplementary Figure 3: No differences in neutrophil and macrophage infiltration in the lung tissues.** Neutrophils (A) and macrophages (B) were stained with antibody against MPO or F4/80, respectively, and counterstained with DAPI for cell nuclei. There was no difference in the % of MPO positive cells or F4/80 positive cells, or total number of cells, between the two groups.

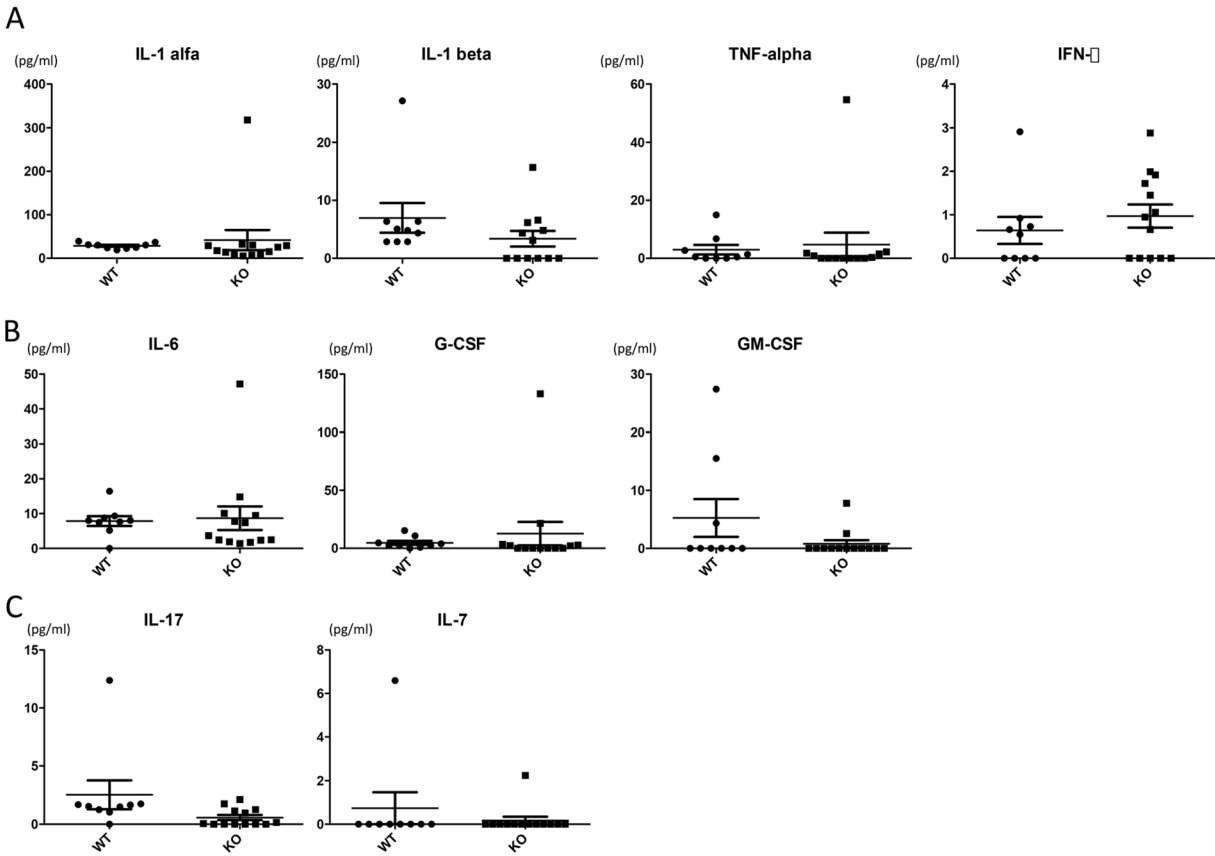

**Supplementary Figure 4: No significant differences in multiple cytokine levels in lung graft tissue lysates. (A)** Early response cytokines (IL-1 $\alpha$ , IL-1 $\beta$ , TNF $\alpha$ , and IFN $\gamma$ ); **(B)** IL-6, G-CSF, GM-CSF; and **(C)** IL-17, IL-7.

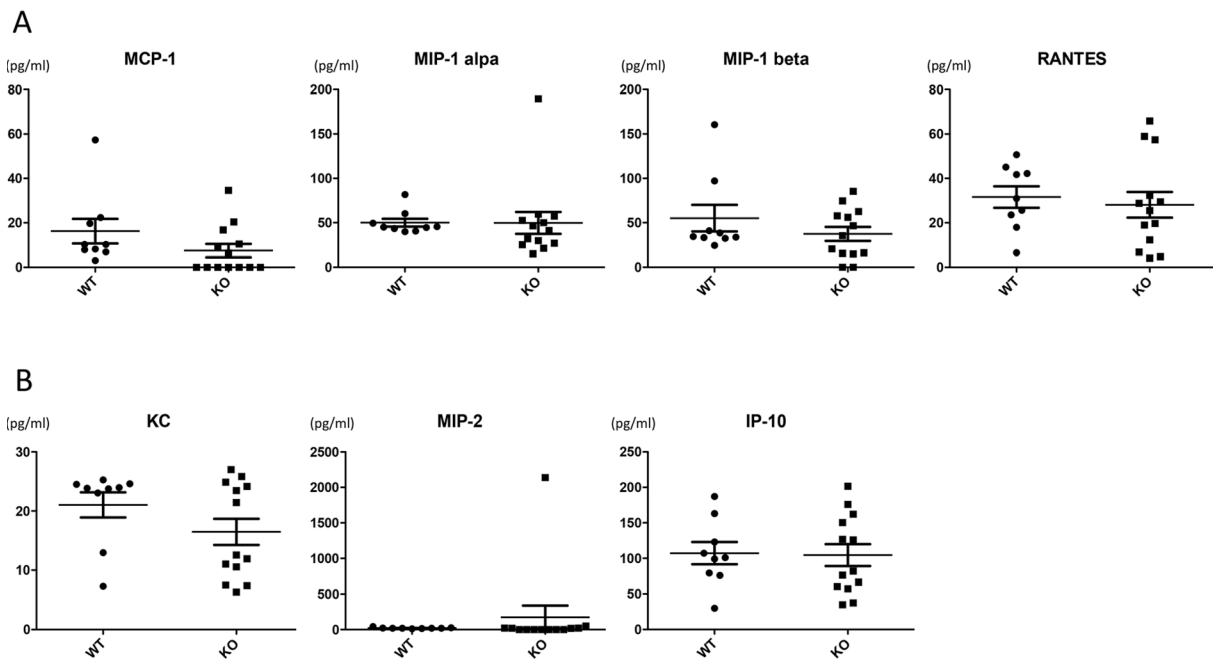

**Supplementary Figure 5: No significant differences in multiple chemokine levels in lung graft tissue lysates. (A)** CC chemokines: MCP-1 (CCL2), MIP-1 alpha (CCL3), MIP-1 beta (CCL4) and RANTES (CCL5); **(B)** CXC chemokines: KC (CXCL1), MIP-2 (CXCL2) and IP-10 (CXCL10).

**Supplementary Table 1: PCR primer sequences for PTX3 transgenic mouse genotyping**

| <b>Targets</b>     | <b>Forward primer (5'-3')</b> | <b>Reverse primer (5'-3')</b> |
|--------------------|-------------------------------|-------------------------------|
| Murine PTX3 exon 2 | ACCTGAGCGCCGTGCAGA            | TGTAAACACCTGCCAATGG           |
| Human HPRT         | ACCCACGAAGTGTGGATA            | TGTAAACACCTGCCAATGG           |
